# Supplementary material
Source: ML conference proceedings conference paper supplement (https://openaccess.thecvf.com/content/CVPR2024/html/Zhou_Bring_Event_into_CVPR_2024_paper.html)
Supplement: Supplementary file 1 [file Zhou_Bring_Event_into_CVPR_2024_supplemental.zip]

Archive with 1 entries (1 files):
- VisMoFlow_Supp.pdf
